# Supplementary material for: Transcriptional Response to Hypoxia: The Role of HIF-1-Associated Co-Regulators
Source: MDPI journal article supplement (doi:10.3390/cells12050798), 2023-03-03
Supplement: s1 [file s1]

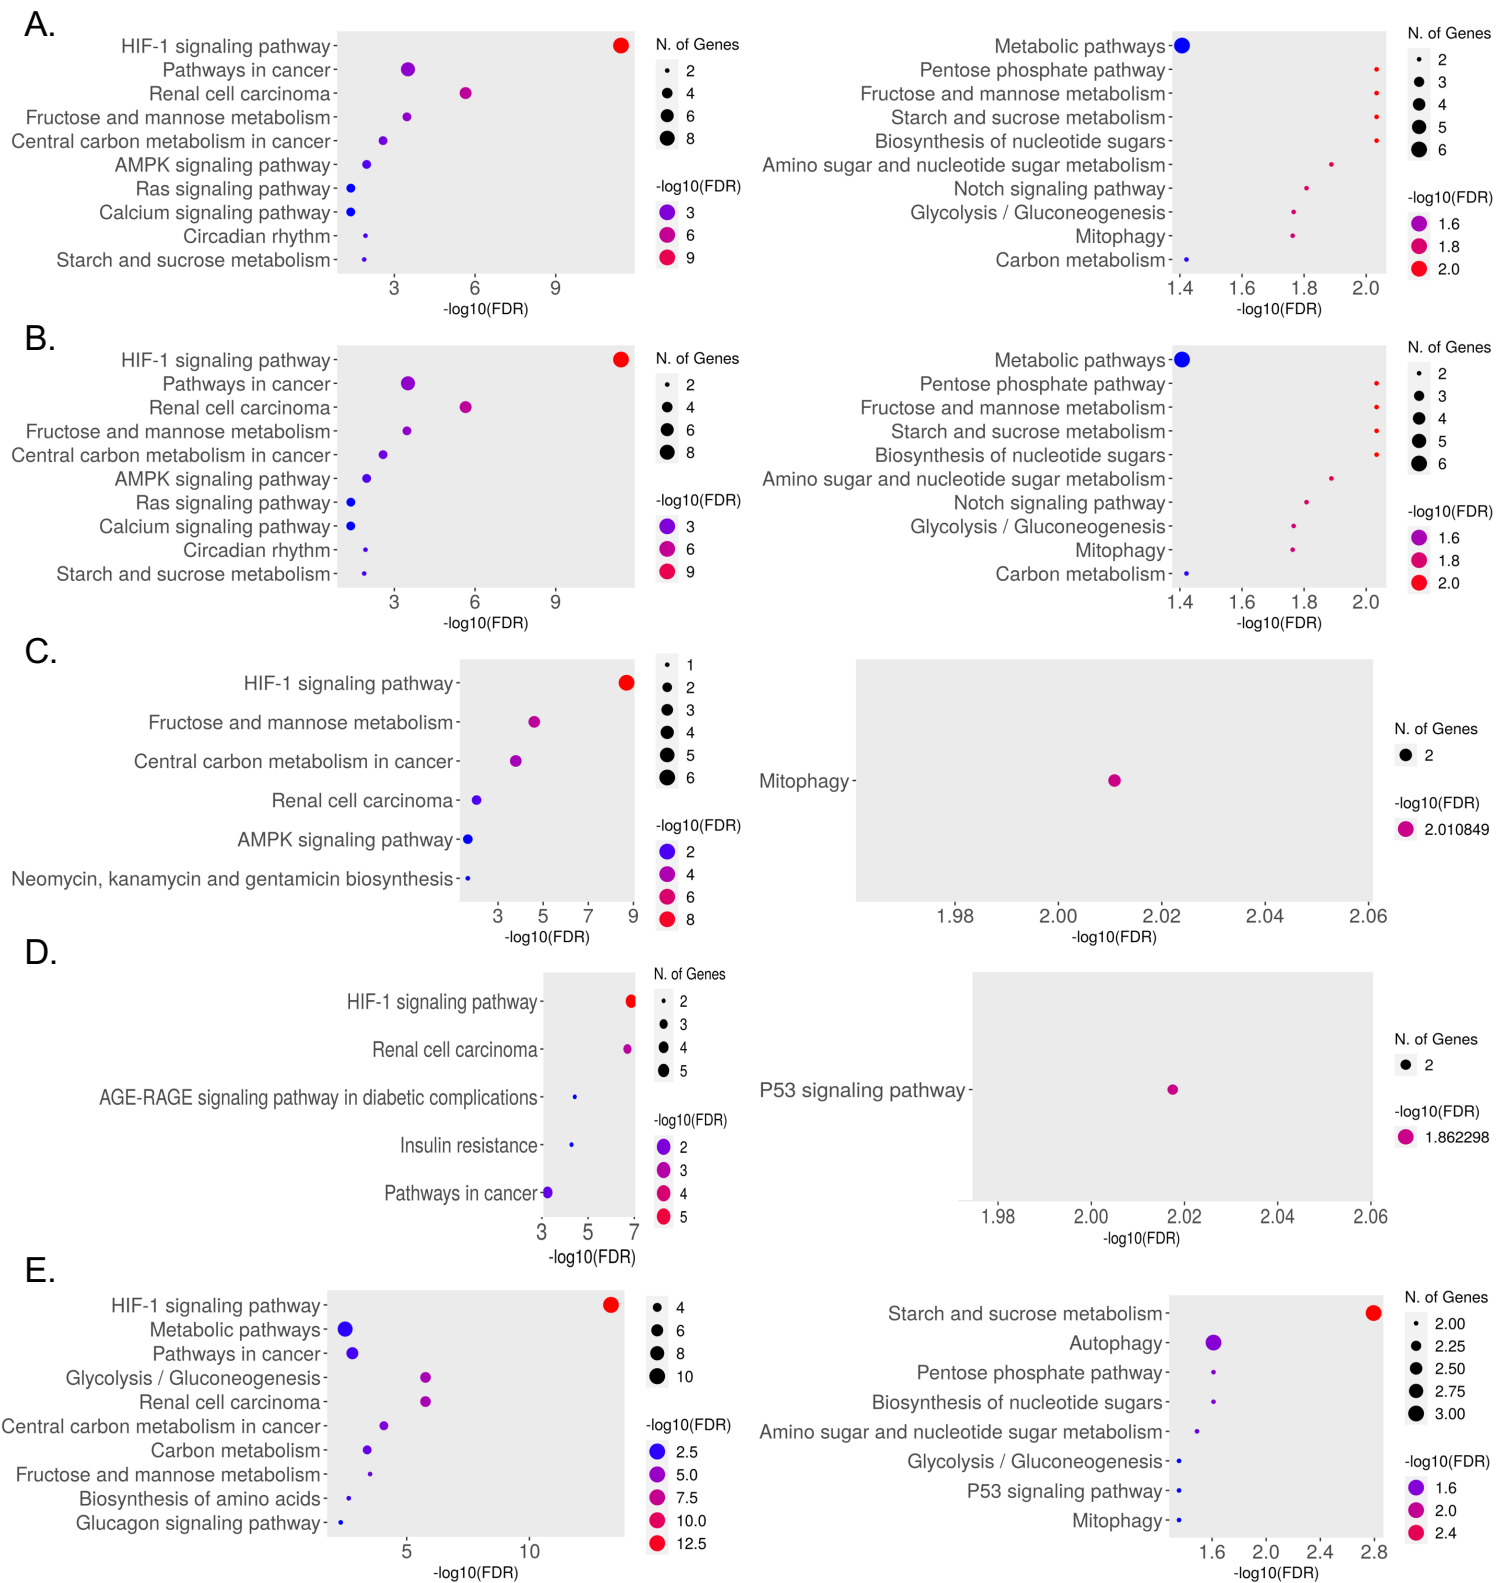

**Supplementary Figure S1.** Dot plots of KEGG pathway analysis of genes common between gene sets regulated by ZMYND8 (A), CDK8 (B), JMJD1A (C), NPM1 (D) or TRIM28 (E) and List A (left panels) or List B (right panels) genes.
