# Supplementary material for: Transcriptional Response to Hypoxia: The Role of HIF-1-Associated Co-Regulators
Source: Cells. 2023 Mar 3;12(5):798. doi: 10.3390/cells12050798 (PMC10001186; doi:10.3390/cells12050798)
Supplement: Supplementary file 1 [file cells-12-00798-s001.zip › Table S1.xlsx]

## Sheet: A. LIST A & reference
LIST A genes	References
ABCB1	Comerford et al., Cancer Res 2002, 62, 3387-3394.	Chen et al., PLoS One 2014, 9, e98882, doi:10.1371/journal.pone.0098882.
ADM	Frede et al., Cancer Res 2005, 65, 4690-4697, doi:10.1158/0008-5472.CAN-04-3877.	Nguyen et al., Biochem Biophys Res Commun 1999, 265, 382-386, doi:10.1006/bbrc.1999.1674.	Garayoa et al., Mol Endocrinol 2000, 14, 848-862, doi:10.1210/mend.14.6.0473.
AGPAT2	Triantafyllou et al., Biochim Biophys Acta Mol Cell Biol Lipids 2018, 1863, 1142-1152, doi:10.1016/j.bbalip.2018.06.015.
ALDOA	Semenza, G.L. et al., J Biol Chem 1996, 271, 32529-32537, doi:10.1074/jbc.271.51.32529.	Semenza et al., J Biol Chem 1994, 269, 23757-23763.
ANGPTL4	Baba et al., Sci Rep 2017, 7, 11127, doi:10.1038/s41598-017-11769-x.	Hu et al.,Oncotarget 2016, 7, 7816-7828, doi:10.18632/oncotarget.6868.	Kubo et al., Oncol Lett 2016, 11, 1026-1034, doi:10.3892/ol.2015.4011.	Li et al., Hepatology 2011, 54, 910-919, doi:10.1002/hep.24479.	Zhang et al., Oncogene 2012, 31, 1757-1770, doi:10.1038/onc.2011.365.
AURKA	Cui et al., Oncotarget 2017, 8, 24840-24852, doi:10.18632/oncotarget.15266.	Klein et al., Mol Biol Cell 2008, 19, 3667-3675, doi:10.1091/mbc.E08-01-0042.
BCL2L1	Chen et al., J Biol Chem 2009, 284, 10004-10012, doi:10.1074/jbc.M805997200.
BHLHE40	Miyazaki et al., J Biol Chem 2002, 277, 47014-47021, doi:10.1074/jbc.M204938200.	Zheng et al., Mol Biol Rep 2012, 39, 4229-4236, doi:10.1007/s11033-011-1209-0.
BHLHE41	Miyazaki et al., J Biol Chem 2002, 277, 47014-47021, doi:10.1074/jbc.M204938200.
BIRC5	Bai et al., Obstet Gynaecol Res 2013, 39, 555-563, doi:10.1111/j.1447-0756.2012.01995.x.	Peng et al., J Biol Chem 2006, 281, 25903-25914, doi:10.1074/jbc.M603414200.
BNIP3L	Bellot et al., Mol Cell Biol 2009, 29, 2570-2581, doi:10.1128/MCB.00166-09.	Mazure et al., Autophagy 2009, 5, 868-869, doi:10.4161/auto.9042.
CA12	Wykoff et al., Cancer Res 2000, 60, 7075-7083.
CA9	Wykoff et al., Cancer Res 2000, 60, 7075-7083.	Grabmaier et al., Oncogene 2004, 23, 5624-5631, doi:10.1038/sj.onc.1207764.	Said et al., Oncology Reports 1994, doi:10.3892/or_00000023.
CCN2	Higgins et al., Am J Physiol Renal Physiol 2004, 287, F1223-1232, doi:10.1152/ajprenal.00245.2004.	Hong et al., Clin Exp Immunol 2006, 146, 362-370, doi:10.1111/j.1365-2249.2006.03199.x.
CCN5	Fuady et al., Hypoxia (Auckl) 2014, 2, 23-33, doi:10.2147/HP.S54404.
CD274	Noman et al., J Exp Med 2014, 211, 781-790, doi:10.1084/jem.20131916.
COX4I2	Fukuda et al., Cell 2007, 129, 111-122, doi:10.1016/j.cell.2007.01.047.
CXCR4	Bao et al., Oncogene 2019, 38, 881-895, doi:10.1038/s41388-018-0452-4.	Guan et al., Cancer Lett 2015, 357, 254-264, doi:10.1016/j.canlet.2014.11.034.	Guo et al., PLoS One 2014, 9, e90518, doi:10.1371/journal.pone.0090518.	Ishikawa et al., Oncol Rep 2009, 21, 707-712.	Oh et al., Oncol Rep 2012, 28, 2239-2246, doi:10.3892/or.2012.2063.	Staller et al., Nature 2003, 425, 307-311, doi:10.1038/nature01874.	Zagzag et al., Lab Invest 2006, 86, 1221-1232, doi:10.1038/labinvest.3700482.
EDN1	Hu et al., Biochem Biophys Res Commun 1998, 245, 894-899, doi:10.1006/bbrc.1998.8543.	Huang et al., FASEB J 2004, 18, 1138-1140, doi:10.1096/fj.04-1510fje.	Minchenko et a., Mol Cell Biochem 2000, 208, 53-62, doi:10.1023/a:1007042729486.	Yamashita et al., J Biol Chem 2001, 276, 12645-12653, doi:10.1074/jbc.M011344200.
EGLN1	Marxsen et al., Biochem J 2004, 381, 761-767, doi:10.1042/BJ20040620.	Metzen et al., Biochem J 2005, 387, 711-717, doi:10.1042/BJ20041736.
EGLN3	Pescador et al., Biochem J 2005, 390, 189-197, doi:10.1042/BJ20042121.
ENO1	Semenza et al., J Biol Chem 1996, 271, 32529-32537, doi:10.1074/jbc.271.51.32529.	Semenza et al., J Biol Chem 1994, 269, 23757-23763.	Zheng et al., PLoS One 2016, 11, e0147961, doi:10.1371/journal.pone.0147961.
ETS1	Oikawa et al., Biochem Biophys Res Commun 2001, 289, 39-43, doi:10.1006/bbrc.2001.5927.
FLT1	Gerber et al., J Biol Chem 1997, 272, 23659-23667, doi:10.1074/jbc.272.38.23659.
FURIN	McMahon et al., J Biol Chem 2005, 280, 6561-6569, doi:10.1074/jbc.M413248200.
GAPDH	Graven et al., Biochim Biophys Acta 1999, 1447, 208-218, doi:10.1016/s0167-4781(99)00118-9.	Higashimura et al., Arch Biochem Biophys 2011, 509, 1-8, doi:10.1016/j.abb.2011.02.011.	Lu et al., Biochim Biophys Acta 2002, 1574, 152-156, doi:10.1016/s0167-4781(01)00359-1.
GYS1	Pescador et al., PLoS One 2010, 5, e9644, doi:10.1371/journal.pone.0009644.
HILPDA	Gimm et al., FASEB J 2010, 24, 4443-4458, doi:10.1096/fj.10-159806.
HK2	Gwak et al., J Hepatol 2005, 42, 358-364, doi:10.1016/j.jhep.2004.11.020.	Mathupala et al., J Biol Chem 2001, 276, 43407-43412, doi:10.1074/jbc.M108181200.	Riddle et al., Am J Physiol Lung Cell Mol Physiol 2000, 278, L407-416, doi:10.1152/ajplung.2000.278.2.L407.
HMOX1	Lee ET AL., J Biol Chem 1997, 272, 5375-5381.
HSP90B1	Paris et al., FEBS Lett 2005, 579, 105-114, doi:10.1016/j.febslet.2004.11.055.
ID2	Lofstedt et al., J Biol Chem 2004, 279, 39223-39231, doi:10.1074/jbc.M402904200.
INSIG2	Hwang et al., J Biol Chem 2017, 292, 9382-9393, doi:10.1074/jbc.M117.788562.
ITGB2	Kong et al., Proc Natl Acad Sci U S A 2004, 101, 10440-10445, doi:10.1073/pnas.0401339101.
KDM3A	Beyer et al., J Biol Chem 2008, 283, 36542-36552, doi:10.1074/jbc.M804578200.	Krieg et al., Mol Cell Biol 2010, 30, 344-353, doi:10.1128/MCB.00444-09.	Pollard et al., Biochem J 2008, 416, 387-394, doi:10.1042/BJ20081238.	Sar et al., Cell Tissue Res 2009, 337, 223-234, doi:10.1007/s00441-009-0805-y.
KDM4B	Beyer et al., J Biol Chem 2008, 283, 36542-36552, doi:10.1074/jbc.M804578200.	Krieg et al., Mol Cell Biol 2010, 30, 344-353, doi:10.1128/MCB.00444-09.	Pollard et al., Biochem J 2008, 416, 387-394, doi:10.1042/BJ20081238.	Fu et al., Carcinogenesis 2012, 33, 1664-1673, doi:10.1093/carcin/bgs217.
LDHA	Cui et al., Oncotarget 2017, 8, 24840-24852, doi:10.18632/oncotarget.15266.	Semenza et al., J Biol Chem 1996, 271, 32529-32537, doi:10.1074/jbc.271.51.32529.
LEP	Ambrosini et al., J Biol Chem 2002, 277, 34601-34609, doi:10.1074/jbc.M205172200.	Cascio et al., Oncogene 2008, 27, 540-547, doi:10.1038/sj.onc.1210660.	Grosfeld et al., J Biol Chem 2002, 277, 42953-42957, doi:10.1074/jbc.M206775200.
LGALS1	Zhao et al., Carcinogenesis 2010, 31, 1367-1375, doi:10.1093/carcin/bgq116.
LOX	Erler et al., Nature 2006, 440, 1222-1226, doi:10.1038/nature04695.	Wang et al., Biochem Biophys Res Commun 2017, 490, 480-485, doi:10.1016/j.bbrc.2017.06.066.
LOXL2	Schietke et al., J Biol Chem 2010, 285, 6658-6669, doi:10.1074/jbc.M109.042424.
LPIN1	Mylonis et al., J Cell Sci 2012, 125, 3485-3493, doi:10.1242/jcs.106682.
LRP1	Castellano et al., Arterioscler Thromb Vasc Biol 2011, 31, 1411-1420, doi:10.1161/ATVBAHA.111.225490.
MCL1	Piret et al., J Biol Chem 2005, 280, 9336-9344, doi:10.1074/jbc.M411858200.
MIR210	Huang et al., Mol Cell 2009, 35, 856-867, doi:10.1016/j.molcel.2009.09.006.
MMP2	Jing et al., Dis Esophagus 2013, 26, 75-83, doi:10.1111/j.1442-2050.2011.01321.x.	Jing et al., Acta Med Okayama 2012, 66, 399-407, doi:10.18926/AMO/48964.	Li et al., Mol Immunol 2013, 53, 227-236, doi:10.1016/j.molimm.2012.08.018.	Liu et al., J Mol Cell Cardiol 2018, 121, 36-50, doi:10.1016/j.yjmcc.2018.06.006.
MMP9	Liu et al., J Mol Cell Cardiol 2018, 121, 36-50, doi:10.1016/j.yjmcc.2018.06.006.	Li et al., Mol Immunol 2013, 53, 227-236, doi:10.1016/j.molimm.2012.08.018.	Li et al., Eur Rev Med Pharmacol Sci 2017, 21, 5361-5369, doi:10.26355/eurrev_201712_13921.
MXI1	Zhang et al., Cancer Cell 2007, 11, 407-420, doi:10.1016/j.ccr.2007.04.001.
NDRG1	Cangul et al., BMC Genet 2004, 5, 27, doi:10.1186/1471-2156-5-27.	Said et al., Oncology Reports 1994, doi:10.3892/or_00000023.	Said et al., Oncol Rep 2009, 21, 237-246.	Sibold et al., FEBS Lett 2007, 581, 989-994, doi:10.1016/j.febslet.2007.01.080.	Wang et al., Mol Biol Rep 2013, 40, 3723-3729, doi:10.1007/s11033-012-2448-4.
NOL3	Ao et al., Biochem Biophys Res Commun 2012, 420, 913-917, doi:10.1016/j.bbrc.2012.03.101.
NOS3	Coulet et al., J Biol Chem 2003, 278, 46230-46240, doi:10.1074/jbc.M305420200.
NPM1	Li et al., J Biol Chem 2004, 279, 41275-41279, doi:10.1074/jbc.C400297200.
NT5E	Synnestvedt et al., J Clin Invest 2002, 110, 993-1002, doi:10.1172/JCI15337.
PDGFA	Huang et al., FASEB J 2004, 18, 1138-1140, doi:10.1096/fj.04-1510fje.
PDGFB	Schito et al., Proc Natl Acad Sci U S A 2012, 109, E2707-2716, doi:10.1073/pnas.1214019109.
PDK1	Kim et al., Cell Metab 2006, 3, 177-185, doi:10.1016/j.cmet.2006.02.002.
PFKFB3	Fukasawa et al., J Biochem 2004, 136, 273-277, doi:10.1093/jb/mvh137.	Obach et al., J Biol Chem 2004, 279, 53562-53570, doi:10.1074/jbc.M406096200.
PFKFB4	Minchenko et al., FEBS Lett 2004, 576, 14-20, doi:10.1016/j.febslet.2004.08.053.
PGK1	Semenza et al., J Biol Chem 1994, 269, 23757-23763.	Li et al., J Biol Chem 1996, 271, 21262-21267, doi:10.1074/jbc.271.35.21262.	Doran et al., Biochimie 2011, 93, 361-368, doi:10.1016/j.biochi.2010.10.009.	Pawlus et al., Oncogene 2014, 33, 1670-1679, doi:10.1038/onc.2013.115.	Pirkmajer et al., Am J Physiol Regul Integr Comp Physiol 2010, 299, R1693-1700, doi:10.1152/ajpregu.00133.2010.
PKM	Christofk et al., Nature 2008, 452, 230-233, doi:10.1038/nature06734.	Luo et al., Cell 2011, 145, 732-744, doi:10.1016/j.cell.2011.03.054.
PLAUR	Buchler et al., Neoplasia 2009, 11, 196-206, doi:10.1593/neo.08734.	Nishi et al., Oncol Rep 2016, 35, 992-998, doi:10.3892/or.2015.4449.
PLOD2	Rosell-Garcia et al., J Biol Chem 2019, 294, 14308-14318, doi:10.1074/jbc.RA119.007674.
PMAIP1	Kim et al., J Exp Med 2004, 199, 113-124, doi:10.1084/jem.20030613.
PPP1R3C	Shen et al., FEBS Lett 2010, 584, 4366-4372, doi:10.1016/j.febslet.2010.09.040.
PPP5C	Zhou, et al., J Biol Chem 2004, 279, 46595-46605, doi:10.1074/jbc.M408320200.
QSOX1	Shi et al., Cell Physiol Biochem 2013, 32, 561-568, doi:10.1159/000354460.
RIT1	Song et al., Cancer Lett 2019, 460, 96-107, doi:10.1016/j.canlet.2019.06.016.
S100A4	Horiuchi et al., Int J Cancer 2012, 131, 1755-1767, doi:10.1002/ijc.27448.	Liu et al., Int J Biochem Mol Biol 2012, 3, 165-178.	Zhang et al., Cancer Sci 2010, 101, 1141-1146, doi:10.1111/j.1349-7006.2010.01533.x.
SERPINE1	Ahn et al., Int J Oncol 2010, 37, 1627-1638, doi:10.3892/ijo_00000817.	Fink et al., Blood 2002, 99, 2077-2083, doi:10.1182/blood.v99.6.2077.	Kimura et al., Tohoku J Exp Med 2002, 196, 259-267, doi:10.1620/tjem.196.259.	Meade et al., Placenta 2007, 28, 1012-1019, doi:10.1016/j.placenta.2007.04.005.
SLC2A1	Baumann et al., Am J Physiol Cell Physiol 2007, 293, C477-485, doi:10.1152/ajpcell.00075.2007.	Ebert et al., J Biol Chem 1995, 270, 29083-29089, doi:10.1074/jbc.270.49.29083.
SPAG4	Shoji et al., Am J Pathol 2013, 182, 2191-2203, doi:10.1016/j.ajpath.2013.02.024.
STC2	Law et al., Exp Cell Res 2010, 316, 466-476, doi:10.1016/j.yexcr.2009.09.018.
TERT	Nishi et al., Mol Cell Biol 2004, 24, 6076-6083, doi:10.1128/MCB.24.13.6076-6083.2004.	Yatabe et al., Oncogene 2004, 23, 3708-3715, doi:10.1038/sj.onc.1207460.
TF	Rolfs et al., J Biol Chem 1997, 272, 20055-20062, doi:10.1074/jbc.272.32.20055.
TFRC	Bianchi et al., Nucleic Acids Res 1999, 27, 4223-4227, doi:10.1093/nar/27.21.4223.	Biswas et al., Biochim Biophys Acta 2013, 1832, 293-301, doi:10.1016/j.bbadis.2012.11.003.	Lok et al., J Biol Chem 1999, 274, 24147-24152, doi:10.1074/jbc.274.34.24147.	Tacchini et al., J Biol Chem 1999, 274, 24142-24146, doi:10.1074/jbc.274.34.24142.
TGFB3	Nishi, H et al., Endocrinology 2004, 145, 4113-4118, doi:10.1210/en.2003-1639.
TGM2	Jang et al., Oncogene 2010, 29, 356-367, doi:10.1038/onc.2009.342.
TLR2	Kuhlicke et al., LoS One 2007, 2, e1364, doi:10.1371/journal.pone.0001364.
TWIST1	Yang et al., Nat Cell Biol 2008, 10, 295-305, doi:10.1038/ncb1691.	Zhang et al., Eur Rev Med Pharmacol Sci 2017, 21, 3061-3068.
VEGFA	Carroll et al., Cancer Res 2006, 66, 6264-6270, doi:10.1158/0008-5472.CAN-05-2519.	Forsythe et al., Mol Cell Biol 1996, 16, 4604-4613, doi:10.1128/MCB.16.9.4604.	Liu et al., Circ Res 1995, 77, 638-643, doi:10.1161/01.res.77.3.638.
VLDLR	Shen et al., Biochem J 2012, 441, 675-683, doi:10.1042/BJ20111377.	Yang et al., FEBS Lett 2014, 588, 4448-4456, doi:10.1016/j.febslet.2014.09.046.	Xie et al., Cell Physiol Biochem 2015, 35, 17-28, doi:10.1159/000369671.
WSB1	Cao et al., Cancer Res 2015, 75, 4839-4851, doi:10.1158/0008-5472.CAN-15-0711.	Tong et al., FEBS Lett 2013, 587, 2530-2535, doi:10.1016/j.febslet.2013.06.017.
ZEB1	Zhang et al., PLoS One 2015, 10, e0129603, doi:10.1371/journal.pone.0129603.	Zhu et al., Oncol Lett 2018, 15, 3482-3489, doi:10.3892/ol.2018.7764.

## Sheet: B. LIST B & reference 
LIST B	Ref. 9	Ref. 8	Ref. 10	Ref. 13	Ref. 14	Ref. 114	Ref. 11	Ref. 12
AK2	+	-	-	-	-	-	+	+
AK3	-	+	-	+	-	-	-	-
ALDOC	+	+	+	-	+	-	-	-
ANKRD37	+	-	-	-	+	-	+	+
ANKZF1	-	-	+	-	+	-	+	+
ASCC1	+	-	-	-	-	-	-	+
ASPH	+	-	-	-	-	-	+	-
ATXN1	-	+	+	-	-	-	-	-
BACE2	-	-	+	-	+	-	-	-
BCKDHA	-	-	-	-	-	-	+	+
BCL2L2	-	-	-	-	+	-	-	+
BNIP3	+	+	-	+	-	+	-	-
BRK1	-	-	-	-	+	-	+	-
C4orf3	-	-	+	-	+	-	+	+
C8orf58	-	-	-	-	+	+	+	+
CCNG2	-	-	+	+	+	-	+	-
CHD1L	-	-	-	-	+	-	+	-
CITED2	-	+	+	-	+	-	-	-
CLK3	+	-	-	-	+	-	-	-
CP	-	-	-	-	-	+	-	+
CRKL	+	-	-	-	+	-	-	+
CTDP1	-	-	-	-	-	+	+	-
DARS1	+	-	+	-	+	-	-	-
DDIT4	+	-	-	-	+	-	+	+
DDX50	-	-	-	-	+	-	+	+
DHRS13	-	-	+	-	+	-	-	-
DHX40	+	-	-	-	-	-	+	-
DNAJB2	-	-	-	-	-	+	+	-
DNASE1	-	-	+	-	+	-	-	-
DSP	-	-	+	-	-	-	-	+
EFNA1	+	-	-	-	-	-	-	+
ENO2	+	+	+	-	-	+	+	-
ERO1A	+	+	+	+	+	+	-	-
FAM13A	+	+	+	-	+	-	+	-
FAM162A	+	+	+	+	+	+	+	+
FAM210A	-	-	-	-	-	+	+	+
FBXO42	+	-	-	-	+	-	-	-
FUT11	-	-	-	-	+	-	+	+
GBE1	-	+	+	-	+	+	+	+
GDF15	-	-	-	-	+	-	-	+
GLRX	-	+	+	-	-	-	+	-
GOLGA1	-	-	-	-	+	-	+	-
GPI	-	-	-	-	+	-	-	+
GPRC5A	-	+	+	-	+	-	-	-
HDHD5	-	-	-	-	+	-	+	-
IGFBP3	+	+	-	-	-	-	-	-
IGFBP5	-	+	-	+	-	-	-	-
ILVBL	-	+	+	-	+	-	-	-
INHA	-	-	+	-	+	-	-	+
IRF2BP2	-	-	-	-	+	-	-	+
JARID1B	-	-	-	-	+	-	+	+
JMJD6	-	-	-	-	+	-	+	-
KDM4C	+	-	-	-	-	-	-	+
KLF10	+	-	-	-	+	-	-	-
KMT2E	-	-	-	-	+	-	-	+
KRCC1	-	-	-	-	-	-	+	+
KRT7	-	-	+	-	+	-	-	-
LGALS8	-	-	-	-	-	-	+	+
LNPK	-	-	+	-	-	-	+	+
LONP1	-	-	-	-	+	-	+	+
MIF	+	-	-	-	+	-	-	-
MPI	+	-	-	-	+	-	+	-
MSANTD3	-	-	-	-	+	-	+	-
MTFP1	-	-	-	-	+	+	-	+
NAMPT	+	-	-	-	+	+	-	-
NARF	+	-	+	-	+	-	-	-
NECTIN4	-	-	+	-	+	-	-	-
NUP58	+	-	-	-	+	-	-	+
OBSL1	-	+	-	-	-	-	-	+
OXSM	-	-	-	-	+	+	-	-
OXSR1	+	-	-	-	+	-	-	-
P4HA1	+	+	-	-	+	+	+	+
P4HA2	+	+	-	-	+	-	-	-
PDLIM2	-	-	+	-	-	-	+	+
PGAM1	+	-	-	-	+	-	-	-
PLAC8	-	+	+	-	-	-	-	-
PLOD1	+	-	-	-	-	-	-	+
PNRC1	-	-	+	-	+	-	+	+
PPME1	+	-	-	-	-	-	+	+
RAD51B	-	-	+	-	+	-	-	-
RAPGEF6	-	-	-	-	+	-	-	+
RBPJ	+	-	+	-	+	-	-	-
RLF	-	-	+	-	-	-	+	-
RNMT	+	-	-	-	-	-	+	+
RRAGD	+	+	-	-	-	-	-	-
RSBN1	+	-	+	-	+	-	-	-
RUNX1	-	-	+	-	+	-	+	-
S100A10	-	-	+	-	+	-	-	-
S100P	-	-	+	-	+	-	-	-
SAP30	-	-	+	-	+	-	+	-
SFXN3	+	+	+	-	-	-	-	-
SLC2A3	-	-	-	+	-	-	-	+
SLC35E1	-	-	-	-	+	-	+	-
SLC45A3	-	-	+	-	+	-	-	-
SNAPC3	+	-	-	-	+	-	+	-
SOS1	-	-	-	-	+	-	-	+
SPRY1	-	-	+	-	+	+	+	+
STBD1	-	+	-	-	-	-	+	-
TMEM45A	+	+	+	-	+	+	+	+
TMEM94	-	-	-	-	+	+	+	+
TPD52	+	-	-	-	+	-	-	-
UGP2	-	-	-	-	-	-	+	+
VDAC1	+	-	-	-	+	-	-	-
VKORC1	-	-	-	-	+	-	+	-
WDR54	-	-	+	-	+	-	+	-
YEATS2	-	+	+	-	-	+	-	-
ZMYND8	-	-	+	-	-	-	+	-
ZNF292	-	+	-	-	-	-	+	+
ZNF395	-	+	-	+	-	-	-	+
	Reference List
Ref. 9	Benita, Y.; Kikuchi, H.; Smith, A.D.; Zhang, M.Q.; Chung, D.C.; Xavier, R.J. An integrative genomics approach identifies Hypoxia Inducible Factor-1 (HIF-1)-target genes that form the core response to hypoxia. Nucleic Acids Res 2009, 37, 4587-4602, doi:10.1093/nar/gkp425.
Ref. 8	Elvidge, G.P.; Glenny, L.; Appelhoff, R.J.; Ratcliffe, P.J.; Ragoussis, J.; Gleadle, J.M. Concordant regulation of gene expression by hypoxia and 2-oxoglutarate-dependent dioxygenase inhibition: the role of HIF-1alpha, HIF-2alpha, and other pathways. J Biol Chem 2006, 281, 15215-15226, doi:10.1074/jbc.M511408200.
Ref. 10	Mole, D.R.; Blancher, C.; Copley, R.R.; Pollard, P.J.; Gleadle, J.M.; Ragoussis, J.; Ratcliffe, P.J. Genome-wide association of hypoxia-inducible factor (HIF)-1alpha and HIF-2alpha DNA binding with expression profiling of hypoxia-inducible transcripts. J Biol Chem 2009, 284, 16767-16775, doi:10.1074/jbc.M901790200.
Ref. 13	Ortiz-Barahona, A.; Villar, D.; Pescador, N.; Amigo, J.; del Peso, L. Genome-wide identification of hypoxia-inducible factor binding sites and target genes by a probabilistic model integrating transcription-profiling data and in silico binding site prediction. Nucleic Acids Res 2010, 38, 2332-2345, doi:10.1093/nar/gkp1205.
Ref. 14	Schodel, J.; Oikonomopoulos, S.; Ragoussis, J.; Pugh, C.W.; Ratcliffe, P.J.; Mole, D.R. High-resolution genome-wide mapping of HIF-binding sites by ChIP-seq. Blood 2011, 117, e207-217, doi:10.1182/blood-2010-10-314427.
Ref. 114	Tanimoto, K.; Tsuchihara, K.; Kanai, A.; Arauchi, T.; Esumi, H.; Suzuki, Y.; Sugano, S. Genome-wide identification and annotation of HIF-1alpha binding sites in two cell lines using massively parallel sequencing. Hugo J 2010, 4, 35-48, doi:10.1007/s11568-011-9150-9.
Ref. 11	Xia, X.; Kung, A.L. Preferential binding of HIF-1 to transcriptionally active loci determines cell-type specific response to hypoxia. Genome Biol 2009, 10, R113, doi:10.1186/gb-2009-10-10-r113.
Ref. 12	Xia, X.; Lemieux, M.E.; Li, W.; Carroll, J.S.; Brown, M.; Liu, X.S.; Kung, A.L. Integrative analysis of HIF binding and transactivation reveals its role in maintaining histone methylation homeostasis. Proc Natl Acad Sci U S A 2009, 106, 4260-4265, doi:10.1073/pnas.0810067106.

## Sheet: C. LIST A overlaps
	ADM	: The green color indicates a common gene between LIST A and the indicated HIF-1 co-regulators
LIST A		ZMYND8	CDK8	Reptin	Pontin	JMJD1A	NPM1	TIP60	TET1	TRIM28
ABCB1
ADM		ADM	ADM				ADM		ADM	ADM
AGPAT2
ALDOA							ALDOA			ALDOA
ANGPTL4		ANGPTL4	ANGPTL4			ANGPTL4	ANGPTL4			ANGPTL4
AURKA									AURKA
BCL2L1
BHLHE40		BHLHE40	BHLHE40			BHLHE40	BHLHE40			BHLHE40
BHLHE41		BHLHE41	BHLHE41						BHLHE41	BHLHE41
BIRC5
BNIP3L		BNIP3L	BNIP3L	BNIP3L		BNIP3L	BNIP3L	BNIP3L		BNIP3L
CA12										CA12
CA9		CA9					CA9	CA9	CA9	CA9
CCN2
CCN5
CD274
COX4I2
CXCR4			CXCR4				CXCR4	CXCR4	CXCR4
EDN1
EGLN1		EGLN1	EGLN1			EGLN1				EGLN1
EGLN3		EGLN3	EGLN3				EGLN3			EGLN3
ENO1		ENO1						ENO1		ENO1
ETS1		ETS1	ETS1		ETS1			ETS1	ETS1
FLT1									FLT1
FURIN		FURIN					FURIN
GAPDH
GYS1		GYS1	GYS1							GYS1
HILPDA		HILPDA	HILPDA							HILPDA
HK2		HK2	HK2			HK2				HK2
HMOX1		HMOX1							HMOX1
HSP90B1		HSP90B1
ID2										ID2
INSIG2		INSIG2	INSIG2							INSIG2
ITGB2										ITGB2
KDM3A		KDM3A	KDM3A			KDM3A
KDM4B		KDM4B	KDM4B		KDM4B
LDHA		LDHA								LDHA
LEP
LGALS1								LGALS1	LGALS1
LOX		LOX				LOX			LOX	LOX
LOXL2		LOXL2	LOXL2				LOXL2			LRP1
LPIN1			LPIN1				LPIN1		LPIN1
LRP1
MCL1		MCL1
MIR210
MMP2
MMP9									MMP9
MXI1		MXI1	MXI1				MXI1			MXI1
NDRG1		NDRG1	NDRG1				NDRG1			NDRG1
NOL3		NOL3	NOL3
NOS3
NPM1
NT5E		NT5E	NT5E					NT5E
PDGFA		PDGFA	PDGFA					PDGFA
PDGFB		PDGFB						PDGFB		PDGFB
PDK1		PDK1	PDK1			PDK1				PDK1
PFKFB3		PFKFB3	PFKFB3			PFKFB3
PFKFB4		PFKFB4	PFKFB4			PFKFB4				PFKFB4
PGK1		PGK1	PGK1	PGK1						PGK1
PKM
PLAUR		PLAUR	PLAUR							PLAUR
PLOD2				PLOD2						PLOD2
PMAIP1										PMAIP1
PPP1R3C		PPP1R3C					PPP1R3C		PPP1R3C	PPP1R3C
PPP5C
QSOX1			QSOX1
RIT1		RIT1
S100A4							S100A4
SERPINE1		SERPINE1	SERPINE1			SERPINE1	SERPINE1
SLC2A1		SLC2A1	SLC2A1			SLC2A1	SLC2A1			SLC2A1
SPAG4		SPAG4	SPAG4			SPAG4
STC2			STC2			STC2	STC2
TERT									TERT
TF
TFRC		TFRC
TGFB3
TGM2									TGM2	TGM2
TLR2		TLR2
TWIST1									TWIST1
VEGFA		VEGFA	VEGFA	VEGFA			VEGFA			VEGFA
VLDLR		VLDLR				VLDLR				VLDLR
WSB1		WSB1	WSB1	WSB1
ZEB1		ZEB1

## Sheet: D. LIST B overlaps
	AK2	: The green color indicates a common gene between LIST B and the indicated HIF-1 co-regulators
LIST B		ZMYND8	CDK8	Reptin	Pontin	JMJD1A	NPM1	TIP60	TET1	TRIM28
AK2		AK2
AK3
ALDOC		ALDOC	ALDOC				ALDOC		ALDOC	ALDOC
ANKRD37		ANKRD37	ANKRD37			ANKRD37	ANKRD37	ANKRD37		ANKRD37
ANKZF1		ANKZF1								ANKZF1
ASCC1
ASPH		ASPH
ATXN1		ATXN1	ATXN1					ATXN1
BACE2
BCKDHA		BCKDHA
BCL2L2
BNIP3		BNIP3	BNIP3	BNIP3		BNIP3				BNIP3
BRK1
C4orf3			C4orf3			C4orf3
C8orf58										C8orf58
CCNG2		CCNG2	CCNG2	CCNG2			CCNG2			CCNG2
CHD1L
CITED2			CITED2			CITED2				CITED2
CLK3		CLK3	CLK3
CP									CP	CP
CRKL
CTDP1
DARS1
DDIT4		DDIT4	DDIT4							DDIT4
DDX50		DDX50
DHRS13
DHX40		DHX40		DHX40						DHX40
DNAJB2			DNAJB2				DNAJB2
DNASE1
DSP		DSP
EFNA1		EFNA1								EFNA1
ENO2		ENO2				ENO2
ERO1A										ERO1A
FAM13A		FAM13A				FAM13A				FAM13A
FAM162A		FAM162A	FAM162A							FAM162A
FAM210A		FAM210A	FAM210A
FBXO42		FBXO42
FUT11		FUT11	FUT11			FUT11			FUT11
GBE1		GBE1	GBE1							GBE1
GDF15		GDF15					GDF15
GLRX		GLRX	GLRX							GLRX
GOLGA1		GOLGA1
GPI		GPI	GPI
GPRC5A		GPRC5A	GPRC5A	GPRC5A			GPRC5A			GPI
HDHD5
IGFBP3		IGFBP3			IGFBP3		IGFBP3		IGFBP3	IGFBP3
IGFBP5
ILVBL
INHA		INHA								INHA
IRF2BP2			IRF2BP2						IRF2BP2
JARID1B
JMJD6		JMJD6	JMJD6
KDM4C		KDM4C	KDM4C							KDM4C
KLF10		KLF10
KMT2E										KMT2E
KRCC1		KRCC1
KRT7									KRT7
LGALS8		LGALS8				LGALS8				LGALS8
LNPK										LNPK
LONP1		LONP1
MIF
MPI			MPI
MSANTD3		MSANTD3
MTFP1		MTFP1							MTFP1
NAMPT		NAMPT	NAMPT						NAMPT
NARF
NECTIN4
NUP58
OBSL1										OBSL1
OXSM
OXSR1		OXSR1
P4HA1		P4HA1	P4HA1
P4HA2		P4HA2								P4HA2
PDLIM2
PGAM1
PLAC8		PLAC8			PLAC8	PLAC8
PLOD1		PLOD1
PNRC1		PNRC1	PNRC1							PNRC1
PPME1							PPME1
RAD51B
RAPGEF6
RBPJ			RBPJ				RBPJ			RBPJ
RLF		RLF	RLF
RNMT		RNMT	RNMT			RNMT
RRAGD		RRAGD							RRAGD	RRAGD
RSBN1		RSBN1
RUNX1
S100A10						S100A10	S100A10			S100A10
S100P		S100P								S100P
SAP30		SAP30
SFXN3
SLC2A3		SLC2A3	SLC2A3			SLC2A3	SLC2A3			SLC2A3
SLC35E1		SLC35E1								SLC35E1
SLC45A3								SLC45A3	SLC45A3
SNAPC3		SNAPC3
SOS1
SPRY1								SPRY1		SPRY1
STBD1		STBD1
TMEM45A		TMEM45A	TMEM45A			TMEM45A				TMEM45A
TMEM94										TMEM94
TPD52		TPD52
UGP2		UGP2								UGP2
VDAC1		VDAC1
VKORC1										VKORC1
WDR54							WDR54			WDR54
YEATS2		YEATS2	YEATS2							YEATS2
ZMYND8		ZMYND8								ZMYND8
ZNF292		ZNF292	ZNF292							ZNF292
ZNF395		ZNF395						ZNF395		ZNF395

## Sheet: E. LIST A overlapping Genes
LIST A overlapping genes	with ZMYND8 regulated genes [53]	with CDK8 regulated genes [54]	with Reptin regulated genes [42]	with Pontin regulated genes [43]	with JMJD1A regulated genes [46]	with NPM1 regulated genes [58]	with TIP60 regulated genes[44]	with TET1 regulated genes [49]	with TRIM28 regulated genes [55]
	ADM	ADM	BNIP3L	ETS1	ANGPTL4	ADM	BNIP3L	ADM	ADM
	ANGPTL4	ANGPTL4	PGK1	KDM4B	BHLHE40	ALDOA	CA9	AURKA	ALDOA
	BHLHE40	BHLHE40	PLOD2		BNIP3L	ANGPTL4	CXCR4	BHLHE41	ANGPTL4
	BHLHE41	BHLHE41	VEGFA		EGLN1	BHLHE40	ENO1	CA9	BHLHE40
	BNIP3L	BNIP3L	WSB1		HK2	BNIP3L	ETS1	CXCR4	BHLHE41
	CA9	CXCR4			KDM3A	CA9	LGALS1	ETS1	BNIP3L
	EGLN1	EGLN1			LOX	CXCR4	NT5E	FLT1	CA12
	EGLN3	EGLN3			PDK1	EGLN3	PDGFA	HMOX1	CA9
	ENO1	ETS1			PFKFB3	FURIN	PDGFB	LGALS1	EGLN1
	ETS1	GYS1			PFKFB4	LOXL2		LOX	EGLN3
	FURIN	HILPDA			SERPINE1	LPIN1		LPIN1	ENO1
	GYS1	HK2			SLC2A1	MXI1		MMP9	GYS1
	HILPDA	INSIG2			SPAG4	NDRG1		PPP1R3C	HILPDA
	HK2	KDM3A			STC2	PPP1R3C		TERT	HK2
	HMOX1	KDM4B			VLDLR	S100A4		TGM2	ID2
	HSP90B1	LOXL2				SERPINE1		TWIST1	INSIG2
	INSIG2	LPIN1				SLC2A1			ITGB2
	KDM3A	MXI1				STC2			LDHA
	KDM4B	NDRG1				VEGFA			LOX
	LDHA	NOL3							LRP1
	LOX	NT5E							MXI1
	LOXL2	PDGFA							NDRG1
	MCL1	PDK1							PDGFB
	MXI1	PFKFB3							PDK1
	NDRG1	PFKFB4							PFKFB4
	NOL3	PGK1							PGK1
	NT5E	PLAUR							PLAUR
	PDGFA	QSOX1							PLOD2
	PDGFB	SERPINE1							PMAIP1
	PDK1	SLC2A1							PPP1R3C
	PFKFB3	SPAG4							SLC2A1
	PFKFB4	STC2							TGM2
	PGK1	VEGFA							VEGFA
	PLAUR	WSB1							VLDLR
	PPP1R3C
	RIT1
	SERPINE1
	SLC2A1
	SPAG4
	TFRC
	TLR2
	VEGFA
	VLDLR
	WSB1
	ZEB1

## Sheet: F. LIST B overlapping Genes
LIST B overlapping genes	with ZMYND8 regulated genes [53]	with CDK8 regulated genes [54]	with Reptin regulated genes [42]	with Pontin regulated genes [43]	with JMJD1A regulated genes [46]	with NPM1 regulated genes [58]	with TIP60 regulated genes[44]	with TET1 regulated genes [49]	with TRIM28 regulated genes [55]
	AK2	ALDOC	BNIP3	IGFBP3	ANKRD37	ALDOC	ANKRD37	ALDOC	ALDOC
	ALDOC	ANKRD37	CCNG2	PLAC8	BNIP3	ANKRD37	ATXN1	CP	ANKRD37
	ANKRD37	ATXN1	DHX40		C4orf3	CCNG2	SLC45A3	FUT11	ANKZF1
	ANKZF1	BNIP3	GPRC5A		CITED2	DNAJB2	SPRY1	IGFBP3	BNIP3
	ASPH	C4orf3			ENO2	GDF15	ZNF395	IRF2BP2	C8orf58
	ATXN1	CCNG2			FAM13A	GPRC5A		KRT7	CCNG2
	BCKDHA	CITED2			FUT11	IGFBP3		MTFP1	CITED2
	BNIP3	CLK3			LGALS8	PPME1		NAMPT	CP
	CCNG2	DDIT4			PLAC8	RBPJ		RRAGD	DDIT4
	CLK3	DNAJB2			RNMT	S100A10		SLC45A3	DHX40
	DDIT4	FAM162A			S100A10	SLC2A3			EFNA1
	DDX50	FAM210A			SLC2A3	WDR54			ERO1A
	DHX40	FUT11			TMEM45A				FAM13A
	DSP	GBE1							FAM162A
	EFNA1	GLRX							GBE1
	ENO2	GPI							GLRX
	FAM13A	GPRC5A							GPI
	FAM162A	IRF2BP2							IGFBP3
	FAM210A	JMJD6							INHA
	FBXO42	KDM4C							KDM4C
	FUT11	MPI							KMT2E
	GBE1	NAMPT							LGALS8
	GDF15	P4HA1							LNPK
	GLRX	PNRC1							OBSL1
	GOLGA1	RBPJ							P4HA2
	GPI	RLF							PNRC1
	GPRC5A	RNMT							RBPJ
	IGFBP3	SLC2A3							RRAGD
	INHA	TMEM45A							S100A10
	JMJD6	YEATS2							S100P
	KDM4C	ZNF292							SLC2A3
	KLF10								SLC35E1
	KRCC1								SPRY1
	LGALS8								TMEM45A
	LONP1								TMEM94
	MSANTD3								UGP2
	MTFP1								VKORC1
	NAMPT								WDR54
	OXSR1								YEATS2
	P4HA1								ZMYND8
	P4HA2								ZNF292
	PLAC8								ZNF395
	PLOD1
	PNRC1
	RLF
	RNMT
	RRAGD
	RSBN1
	S100P
	SAP30
	SLC2A3
	SLC35E1
	SNAPC3
	STBD1
	TMEM45A
	TPD52
	UGP2
	VDAC1
	YEATS2
	ZMYND8
	ZNF292
	ZNF395

## Sheet: G. LIST A (Fig3A)
LIST A overlap with all	LIST A overlap with ZMYND8,CDK8,JMJD1A,NPM1	LIST A overlap with ZMYND8,CDK8,JMJD1A,TRIM28	LIST A overlap with ZMYND8,CDK8,NPM1,TRIM28	LIST A overlap with ZMYND8,CDK8,JMJD1A	LIST A overlap with ZMYND8,CDK8,NPM1	LIST A overlap with ZMYND8,CDK8,TRIM28	LIST A overlap with ZMYND8,JMJD1A,TRIM28	LIST A overlap with ZMYND8,NPM1,TRIM28	LIST A overlap with CDK8,JMJD1A,NPM1	LIST A overlap with ZMYND8,CDK8	LIST A overlap with ZMYND8,NPM1	LIST A overlap with ZMYND8,TRIM28	LIST A overlap with CDK8,NPM1	LIST A overlap with NPM1,TRIM28	LIST A overlap with ZMYND8	SET-A overlap with CDK8	LIST A overlap with NPM1	LIST A overlap with TRIM28	LIST A with no overlap
BHLHE40	SERPINE1	HK2	NDRG1	KDM3A	LOXL2	PGK1	LOX	CA9	STC2	ETS1	FURIN	LDHA	CXCR4	ALDOA	HSP90B1	QSOX1	S100A4	CA12	GAPDH
SLC2A1		PFKFB4	VEGFA	PFKFB3		INSIG2	VLDLR	PPP1R3C		NT5E		ENO1	LPIN1		MCL1			ID2	TF
BNIP3L		PDK1	ADM	SPAG4		PLAUR				WSB1		PDGFB			TFRC			LRP1	AGPAT2
ANGPTL4		EGLN1	MXI1			GYS1				KDM4B					ZEB1			PMAIP1	PKM
			EGLN3			HILPDA				NOL3					HMOX1			PLOD2	CCN5
						BHLHE41				PDGFA					RIT1			ITGB2	ABCB1
															TLR2			TGM2	AURKA
																			BCL2L1
																			BIRC5
																			CD274
																			COX4I2
																			CCN2
																			EDN1
																			FLT1
																			LEP
																			LGALS1
																			MIR210
																			MMP2
																			MMP9
																			NOS3
																			NPM1
																			PPP5C
																			TERT
																			TGFB3
																			TWIST1

## Sheet: H. LIST B (Fig3B)
LIST B overlap with all	LIST B overlap with ZMYND8,CDK8,JMJD1A,TRIM28	LIST B overlap with ZMYND8,CDK8,NPM1,TRIM28	LIST B overlap with ZMYND8,CDK8,JMJD1A	LIST B overlap with ZMYND8,CDK8,NPM1	LIST B overlap with ZMYND8,CDK8,TRIM28	LIST B overlap with CDK8,JMJD1A,TRIM28	LIST B overlap with ZMYND8,NPM1,TRIM28	LIST B overlap with JMJD1A,NPM1,TRIM28	LIST B overlap with ZMYND8,JMJD1A,TRIM28	LIST B overlap with CDK8,NPM1,TRIM28	LIST B overlap with ZMYND8,CDK8	LIST B overlap with ZMYND8,JMJD1A	LIST B overlap with ZMYND8,NPM1	LIST B overlap with ZMYND8,TRIM28	LIST B overlap with CDK8,JMJD1A	LIST B overlap with CDK8,NPM1	LIST B overlap with NPM1,TRIM28	LIST B overlap with ZMYND8	LIST B overlap with CDK8	LIST B overlap with NPM1	LIST B overlap with TRIM28	LIST B with no overlap
SLC2A3	BNIP3	CCNG2	RNMT	GPRC5A	DDIT4	CITED2	IGFBP3	S100A10	LGALS8	RBPJ	NAMPT	ENO2	GDF15	SLC35E1	C4orf3	DNAJB2	WDR54	OXSR1	IRF2BP2	PPME1	KMT2E	JARID1B
ANKRD37	TMEM45A	ALDOC	FUT11		GBE1				FAM13A		P4HA1	PLAC8		ZNF395				DSP	MPI		CP	PDLIM2
					GLRX						RLF			DHX40				LONP1			OBSL1	CRKL
					PNRC1						ATXN1			ZMYND8				PLOD1			LNPK	NUP58
					GPI						JMJD6			RRAGD				VDAC1			SPRY1	RUNX1
					YEATS2						FAM210A			ANKZF1				AK2			VKORC1	ILVBL
					ZNF292						CLK3			UGP2				ASPH			TMEM94	DARS1
					FAM162A									EFNA1				TPD52			ERO1A	NARF
					KDM4C									INHA				DDX50			C8orf58	SFXN3
														S100P				SAP30				SOS1
																		GOLGA1				BCL2L2
																		STBD1				RAPGEF6
																		RSBN1				ASCC1
																		MTFP1				CTDP1
																		KRCC1				BRK1
																		MSANTD3				HDHD5
																		KLF10				CHD1L
																		BCKDHA				OXSM
																		FBXO42				BACE2
																		SNAPC3				NECTIN4
																						RAD51B
																						SLC45A3
																						DHRS13
																						DNASE1
																						KRT7
																						MIF
																						PGAM1
																						AK3
																						IGFBP5
